# Supplementary material for: The discriminatory cost of ICD-10-CM transition between clinical specialties: metrics, case study, and mitigating tools
Source: PubMed Central journal article supplement — J Am Med Inform Assoc. 2013 May 5;20(4):708–17. doi: 10.1136/amiajnl-2012-001358 (PMC3721160; doi:10.1136/amiajnl-2012-001358), 2013-05-05

**Supplement Figure S1. Study methodology.** The goal of the study is to provide, identify, and quantify problematic ICD-9-CM to ICD-10-CM mapping motifs because these may affect the management of clinical practice. As shown on the top of the figure, two CMS General Equivalent Mapping (GEM) files provided by the Center for Medicaid and Medicare Services (CMS) correspond to the mapping of ICD-9-CM to ICD-10-CM and the converse. These are integrated in a network (**Figure 2A**) that is further abstracted as an assemblage of mapping motifs (**Figure 1**). These mapping motifs describe in detail the relationships between one ICD-9-CM code, their mapping into ICD-10-CM, and their direct mapping back to ICD-9-CM. These mapping motifs are synthesized into five mapping categories (from the simplest to the most convoluted mapping categories, **Figure 2B**), from which all statistics are determined, such as the number of mappings in each category per clinical specialty (**Figure 3**). The labeled ICD-9-CM and the respective mapping categories are applied to a statewide emergency department billing data (ED-IHC). The number of ICD-9-CM codes, patient encounters, and cost for the 5 mapping categories is then calculated in the ED (**Figure 4A**). From the cost calculation, identification of high cost convoluted codes revealed two challenging mapping to ICD-10-CM. For example, the concept of “Accidental poisoning by unspecified drug” does not exist anymore in ICD-10-CM, where emergency department physicians will be required to specify the drug category that requires a certainty not reflecting clinical practice.

ICD-9-CM to ICD-10-CM forward and backward

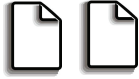

Visualize joint network

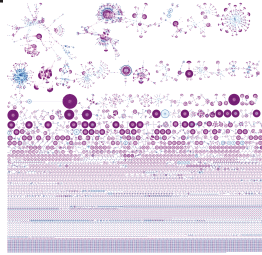

Fig. 2 A

Analysis of network motifs

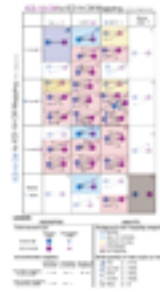

Fig. 1

Network motifs synthesized as categories

| Mapping Category  | Percentage | Mapping Motif Example                                                                          | Mean Category (R10.10) | Mean Category (R10.10) |
|-------------------|------------|------------------------------------------------------------------------------------------------|------------------------|------------------------|
| Identity          | 24%        | Mapping relation of acute post-infectious colitis to Mapping relation of acute gastroenteritis | 100                    | 100                    |
| Class-to-Subclass | 22%        | Mapping relation of acute gastroenteritis to Mapping relation of acute gastroenteritis         | 100                    | 100                    |
| Subclass-to-Class | 11%        | Mapping relation of acute gastroenteritis to Mapping relation of acute gastroenteritis         | 100                    | 100                    |
| Convolutated      | 14%        | Mapping relation of acute gastroenteritis to Mapping relation of acute gastroenteritis         | 100                    | 100                    |
| No mapping        | 11%        | Mapping relation of acute gastroenteritis to Mapping relation of acute gastroenteritis         | 100                    | 100                    |

Fig. 2 B & Table 3

Discrimination by clinical specialty

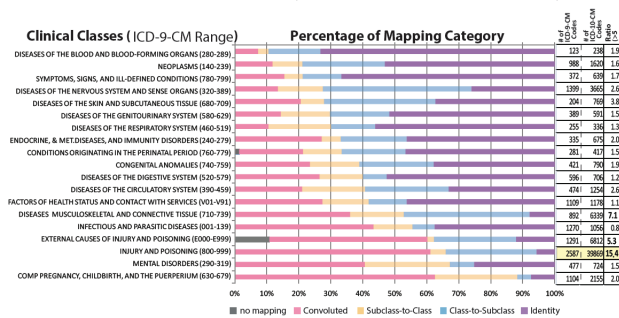

Fig. 3

ED-IHC Data  
217 Facilities  
14,472 patients  
24,000 Encounters

Emergency Dept. coding stats

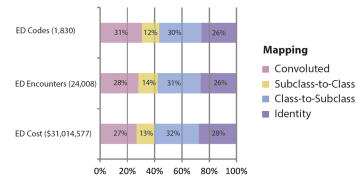

Fig. 4 A

Convolutated coding cost impact

Fig. 4 B-C

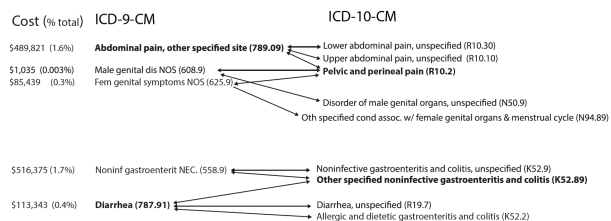

Supplement: amiajnl-2012-001358-s1.pdf [file amiajnl-2012-001358-s1.pdf]
